# Supplementary material for: Green synthesis of submicron copper powder with narrow particle size distribution via a simple methanol thermal reduction
Source: Royal Society of Chemistry journal article supplement (doi:10.1039/d1dt03464b), 2021-01-01
Supplement: d1dt03464b1.pdf [file d1dt03464b1.pdf]

## **Green synthesis of submicron copper powder with narrow particle size distribution via a simple methanol thermal reduction**

Xiaoping Chen<sup>a,\*</sup>, Jiaqi Fu<sup>a</sup>, Jiangang Li<sup>a</sup>, Bohong Chen<sup>a</sup>, Lei Yang<sup>a</sup>, Zhichun Li<sup>b</sup>

<sup>a</sup> Institute of Energy Research, Jiangxi Academy of Sciences, Nanchang, 330096, P. R. China;

<sup>b</sup> School of Petrochemical Engineering, Changzhou University, Changzhou, 213164, P. R. China.

*\*Corresponding authors: Xiaoping Chen*

*Tel: 86-0794-88337597, E-mail: cxpjxskxy@126.com*

This file contains Figure S1-S3

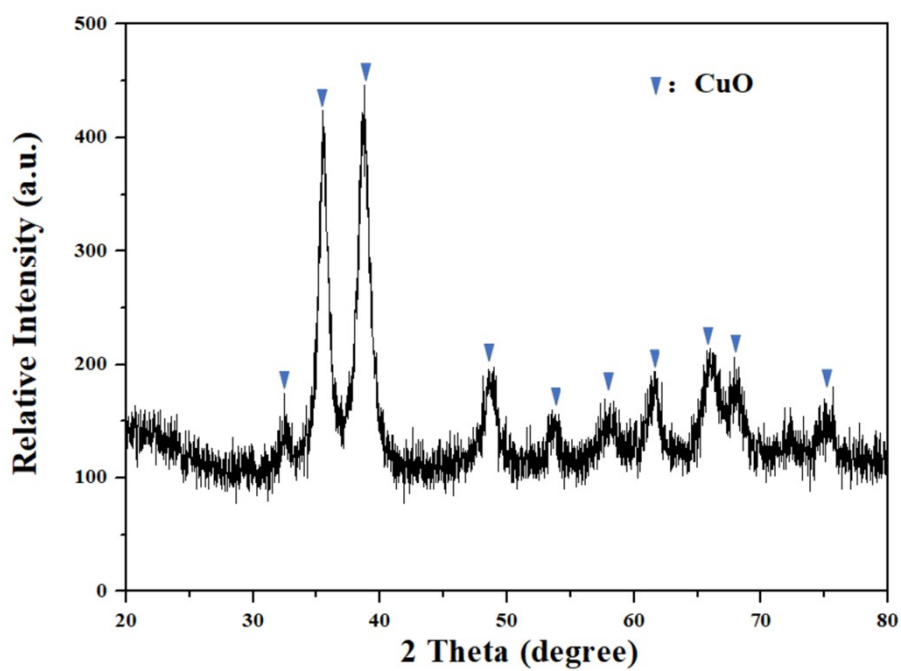

Figure S1. XRD pattern of Cu-t-0

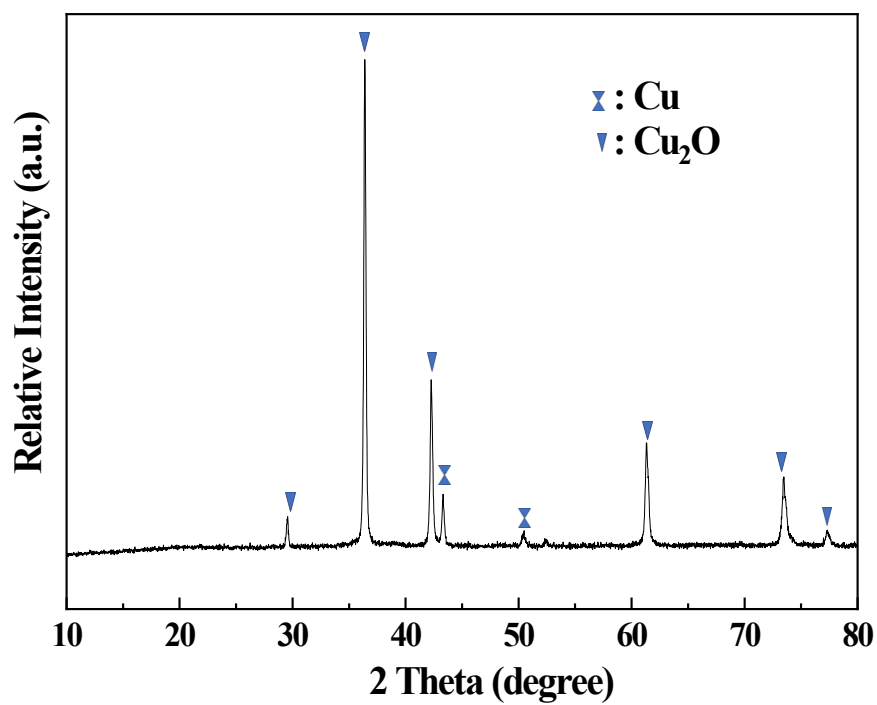

Figure S2. XRD pattern of Cu-t-3

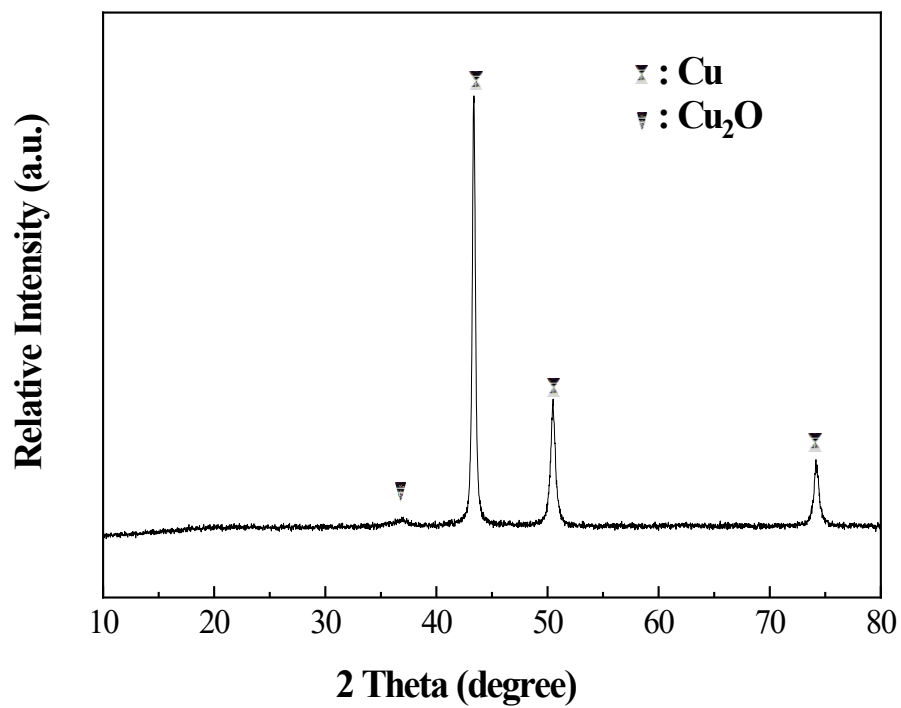

Figure S3. XRD pattern of Cu-t-6
